# Supplementary material for: Arachidonic acid, a clinically adverse mediator in the ovarian cancer microenvironment, impairs JAK‐STAT signaling in macrophages by perturbing lipid raft structures
Source: PubMed Central journal article supplement (PMC9441005; doi:10.1002/1878-0261.13221), 2022-05-04
Supplement: MOL2-16-3146-s003.pdf [file MOL2-16-3146-s003.pdf]

## LC-MSMS Parametrization

This file is produced using R and the package openxlsx .

### Tab Index

|                      |                                                                                                                                       |
|----------------------|---------------------------------------------------------------------------------------------------------------------------------------|
| LC-MSMS Parameters:  | LC-MS/MS parameters extracted from ThermoFisher Scientific RAW files using                                                            |
| LC Gradient:         | Chromatography gradient(s) extracted from ThermoFisher Scientific RAW files using (Kiweler,                                           |
| MaxQuant Parameters: | Parametrization of the MaxQuant suite of algorithms (Cox and Mann, 2008; Cox, Hein, Lubner, Paron, Nagaraj, and Mann, Matthias, 2014; |

### Bibliography

- [1] J. Cox, M. Y. Hein, C. A. Lubner, et al. "Accurate Proteome-wide Label-free Quantification by Delayed Normalization and Maximal Peptide Ratio Extraction, Termed MaxLFQ". In: *Molecular & Cellular Proteomics* 13.9 (2014), pp. 2513-2526. DOI: 10.1074/mcp.M113.031591.
- [2] J. Cox and M. Mann. "MaxQuant enables high peptide identification rates, individualized p.p.b.-range mass accuracies and proteome-wide protein quantification". In: *Nature Biotechnology* 26.12 (2008), pp. 1367-1372. DOI: 10.1038/nbt.1511.
- [3] J. Cox, N. Neuhauser, A. Michalski, et al. "Andromeda: A Peptide Search Engine Integrated into the MaxQuant Environment". In: *Journal of Proteome Research* 10.4 (2011), pp. 1794-1805. DOI: 10.1021/pr101065j.
- [4] M. Kiweler, M. Looso, and J. Graumann. "MARMoSET – Extracting Publication-Ready Mass Spectrometry Metadata from RAW Files". In: *Molecular & Cellular Proteomics* (Jan. 01, 2019), p. mcp.TIR119.001505. DOI: 10.1074/mcp.TIR119.001505.

| <b>Term</b>                                                | <b>Value</b>                  |
|------------------------------------------------------------|-------------------------------|
| High Performance Liquid Chromatography (HPLC) Instrument   | Thermo EASY-nLC               |
| HPLC Vendor                                                | Thermo Scientific             |
| Injected Sample Volume                                     | 4.00                          |
| Mass Spectrometer (MS)                                     | Q Exactive HF - Orbitrap MS   |
| MS Vendor                                                  | Thermo Scientific             |
| MS Model                                                   | QExactive HF                  |
| MS Instrument Software                                     | Xcalibur                      |
| MS Instrument Software Version                             | 2.11-211200/2.11.0.3007       |
| MS Ionization Type                                         | Electrospray Ionization (ESI) |
| MS Electrospray Voltage                                    | 1900                          |
| MS Heated Capillary Temperature                            | 350                           |
| MS Analyzer Precursor Ion Spectrum (MS1)                   | orbitrap                      |
| MS Data Type Precursor Ion Spectrum (MS1)                  | Profile                       |
| MS Micro Spectra Precursor Ion Spectrum (MS1)              | 1                             |
| MS Resolution Precursor Ion Spectrum (MS1)                 | 60,000                        |
| MS Resolution m/z Precursor Ion Spectrum (MS1)             | 200 m/z                       |
| MS Mass Range Precursor Ion Spectrum (MS1)                 | 300 to 1650 m/z               |
| MS Ion Target Value Precursor Ion Spectrum (MS1)           | 3e6                           |
| MS Max. Injection Time Precursor Ion Spectrum (MS1)        | 15 ms                         |
| MS Analyzer Fragment Ion Spectrum (MS2)                    | orbitrap                      |
| MS Data Type Fragment Ion Spectrum (MS2)                   | Profile                       |
| MS Micro Spectra Fragment Ion Spectrum (MS2)               | 1                             |
| MS Fixed First m/z Fragment Ion Spectrum (MS2)             | -                             |
| MS Isolation Window Width Fragment Ion Spectrum (MS2)      | 1.2 m/z                       |
| MS Isolation Window Offset Fragment Ion Spectrum (MS2)     | 0.0 m/z                       |
| MS Fragmentation Mode (MS2)                                | HCD                           |
| MS Normalized Collision Energy Fragment Ion Spectrum (MS2) | nce: 28                       |
| MS Resolution Fragment Ion Spectrum (MS2)                  | 15,000                        |
| MS Resolution m/z Fragment Ion Spectrum (MS2)              | 200 m/z                       |
| MS Ion Target Value Fragment Ion Spectrum (MS2)            | 5e5                           |
| MS Max. Injection Time Fragment Ion Spectrum (MS2)         | 15 ms                         |
| MS Loop Count (Top n) Fragment Ion Spectrum (MS2)          | 20                            |
| MS Charge States Excluded from Fragmentation               | unassigned, 1, >8             |
| MS Minimum Peak Intensity for Fragmentation                | 1.0e5                         |
| MS Fragmentation Trigger on Peak Apex                      | -                             |
| MS Dynamic Exclusion Length                                | 20.0 s                        |
| MS Isotopologue Exclusion                                  | on                            |
| MS Peptide Model for Excluded Isotope Clusters             | preferred                     |

| <b>Time[mm:ss]</b> | <b>Duration[mm:ss]</b> | <b>Flow[nl/min]</b> | <b>Mixture[%B]</b> |
|--------------------|------------------------|---------------------|--------------------|
| 00:00              | 00:00                  | 300                 | 5                  |
| 05:00              | 05:00                  | 300                 | 5                  |
| 125:00             | 120:00                 | 300                 | 38                 |
| 132:00             | 07:00                  | 300                 | 60                 |
| 138:00             | 06:00                  | 300                 | 95                 |
| 143:00             | 05:00                  | 300                 | 95                 |
| 148:00             | 05:00                  | 300                 | 5                  |
| 150:00             | 02:00                  | 300                 | 5                  |

| Parameter                                        | Value                                                                                                  |
|--------------------------------------------------|--------------------------------------------------------------------------------------------------------|
| Version                                          | 1.6.17.0                                                                                               |
| User name                                        | aklaus                                                                                                 |
| Machine name                                     | KI-S0114                                                                                               |
| Date of writing                                  | 07/10/2021 20:03:29                                                                                    |
| Include contaminants                             | True                                                                                                   |
| PSM FDR                                          | 0.01                                                                                                   |
| PSM FDR Crosslink                                | 0.01                                                                                                   |
| Protein FDR                                      | 0.01                                                                                                   |
| Site FDR                                         | 0.01                                                                                                   |
| Use Normalized Ratios For Occupancy              | True                                                                                                   |
| Min. peptide Length                              | 7                                                                                                      |
| Min. score for unmodified peptides               | 0                                                                                                      |
| Min. score for modified peptides                 | 40                                                                                                     |
| Min. delta score for unmodified peptides         | 0                                                                                                      |
| Min. delta score for modified peptides           | 6                                                                                                      |
| Min. unique peptides                             | 0                                                                                                      |
| Min. razor peptides                              | 1                                                                                                      |
| Min. peptides                                    | 1                                                                                                      |
| Use only unmodified peptides and                 | True                                                                                                   |
| Modifications included in protein quantification | Oxidation (M);Acetyl (Protein N-term)                                                                  |
| Peptides used for protein quantification         | Razor                                                                                                  |
| Discard unmodified counterpart peptides          | True                                                                                                   |
| Label min. ratio count                           | 2                                                                                                      |
| Use delta score                                  | False                                                                                                  |
| iBAQ                                             | False                                                                                                  |
| iBAQ log fit                                     | False                                                                                                  |
| Match between runs                               | True                                                                                                   |
| Matching time window [min]                       | 0.7                                                                                                    |
| Match ion mobility window [indices]              | 0.05                                                                                                   |
| Alignment time window [min]                      | 20                                                                                                     |
| Alignment ion mobility window [indices]          | 1                                                                                                      |
| Find dependent peptides                          | False                                                                                                  |
| Fasta file                                       | \\ki-s0211.kerckhoff.mpg.de\AG-Proteomics\$\Fasta<br>2021\HUMAN_9606_can+iso_202102<br>08_194237.fasta |
| Decoy mode                                       | revert                                                                                                 |
| Include contaminants                             | True                                                                                                   |
| Advanced ratios                                  | True                                                                                                   |
| Fixed andromeda index folder                     |                                                                                                        |
| Combined folder location                         |                                                                                                        |
| Second peptides                                  | False                                                                                                  |
| Stabilize large LFQ ratios                       | True                                                                                                   |
| Separate LFQ in parameter groups                 | False                                                                                                  |
| Require MS/MS for LFQ comparisons                | True                                                                                                   |
| Calculate peak properties                        | False                                                                                                  |
| Main search max. combinations                    | 200                                                                                                    |

|                                           |        |
|-------------------------------------------|--------|
| Advanced site intensities                 | True   |
| Write msScans table                       | False  |
| Write msmsScans table                     | True   |
| Write ms3Scans table                      | True   |
| Write allPeptides table                   | True   |
| Write mzRange table                       | True   |
| Write DIA fragments table                 | False  |
| Write pasefMsmsScans table                | True   |
| Write accumulatedPasefMsmsScans table     | False  |
| Max. peptide mass [Da]                    | 4600   |
| Min. peptide length for unspecific search | 8      |
| Max. peptide length for unspecific search | 25     |
| Razor protein FDR                         | True   |
| Disable MD5                               | False  |
| Max mods in site table                    | 3      |
| Match unidentified features               | False  |
| Epsilon score for mutations               |        |
| Evaluate variant peptides separately      | True   |
| Variation mode                            | None   |
| MS/MS tol. (FTMS)                         | 20 ppm |
| Top MS/MS peaks per Da interval. (FTMS)   | 12     |
| Da interval. (FTMS)                       | 100    |
| MS/MS deisotoping (FTMS)                  | True   |
| MS/MS deisotoping tolerance (FTMS)        | 7      |
| MS/MS deisotoping tolerance unit (FTMS)   | ppm    |
| MS/MS higher charges (FTMS)               | True   |
| MS/MS water loss (FTMS)                   | True   |
| MS/MS ammonia loss (FTMS)                 | True   |
| MS/MS dependent losses (FTMS)             | True   |
| MS/MS recalibration (FTMS)                | False  |
| MS/MS tol. (ITMS)                         | 0.5 Da |
| Top MS/MS peaks per Da interval. (ITMS)   | 8      |
| Da interval. (ITMS)                       | 100    |
| MS/MS deisotoping (ITMS)                  | False  |
| MS/MS deisotoping tolerance (ITMS)        | 0.15   |
| MS/MS deisotoping tolerance unit (ITMS)   | Da     |
| MS/MS higher charges (ITMS)               | True   |
| MS/MS water loss (ITMS)                   | True   |
| MS/MS ammonia loss (ITMS)                 | True   |
| MS/MS dependent losses (ITMS)             | True   |
| MS/MS recalibration (ITMS)                | False  |
| MS/MS tol. (TOF)                          | 40 ppm |
| Top MS/MS peaks per Da interval. (TOF)    | 10     |
| Da interval. (TOF)                        | 100    |
| MS/MS deisotoping (TOF)                   | True   |
| MS/MS deisotoping tolerance (TOF)         | 0.01   |
| MS/MS deisotoping tolerance unit (TOF)    | Da     |
| MS/MS higher charges (TOF)                | True   |

|                                            |                        |
|--------------------------------------------|------------------------|
| MS/MS water loss (TOF)                     | True                   |
| MS/MS ammonia loss (TOF)                   | True                   |
| MS/MS dependent losses (TOF)               | True                   |
| MS/MS recalibration (TOF)                  | False                  |
| MS/MS tol. (Unknown)                       | 20 ppm                 |
| Top MS/MS peaks per Da interval. (Unknown) | 12                     |
| Da interval. (Unknown)                     | 100                    |
| MS/MS deisotoping (Unknown)                | True                   |
| MS/MS deisotoping tolerance (Unknown)      | 7                      |
| MS/MS deisotoping tolerance unit (Unknown) | ppm                    |
| MS/MS higher charges (Unknown)             | True                   |
| MS/MS water loss (Unknown)                 | True                   |
| MS/MS ammonia loss (Unknown)               | True                   |
| MS/MS dependent losses (Unknown)           | True                   |
| MS/MS recalibration (Unknown)              | False                  |
| Site tables                                | Oxidation (M)Sites.txt |
